# Supplementary material for: G6PD facilitates clear cell renal cell carcinoma invasion by enhancing MMP2 expression through ROS-MAPK axis pathway
Source: PubMed Central journal article supplement — Int J Oncol. 2020 Apr 8;57(1):197–212. doi: 10.3892/ijo.2020.5041 (PMC7252464; doi:10.3892/ijo.2020.5041), 2020-04-08

Figure S1. mRNA expression of (A) MMP1, (B) MMP7, (C) MMP9, (D) MMP10 and (E) MMP13 in Caki-1-G6PD knock-down cells and ACHN-G6PD overexpressing cells by using reverse transcription quantitative PCR. Data were expressed as the means  $\pm$  standard deviation. \* $P$ <0.05, \*\* $P$ <0.01 and \*\*\* $P$ <0.001 vs. non-silencer or control. G6PD, glucose-6-phosphate dehydrogenase; KD, knockdown; MMP, matrix metalloproteinase; ns, not significant; OE, overexpressing.

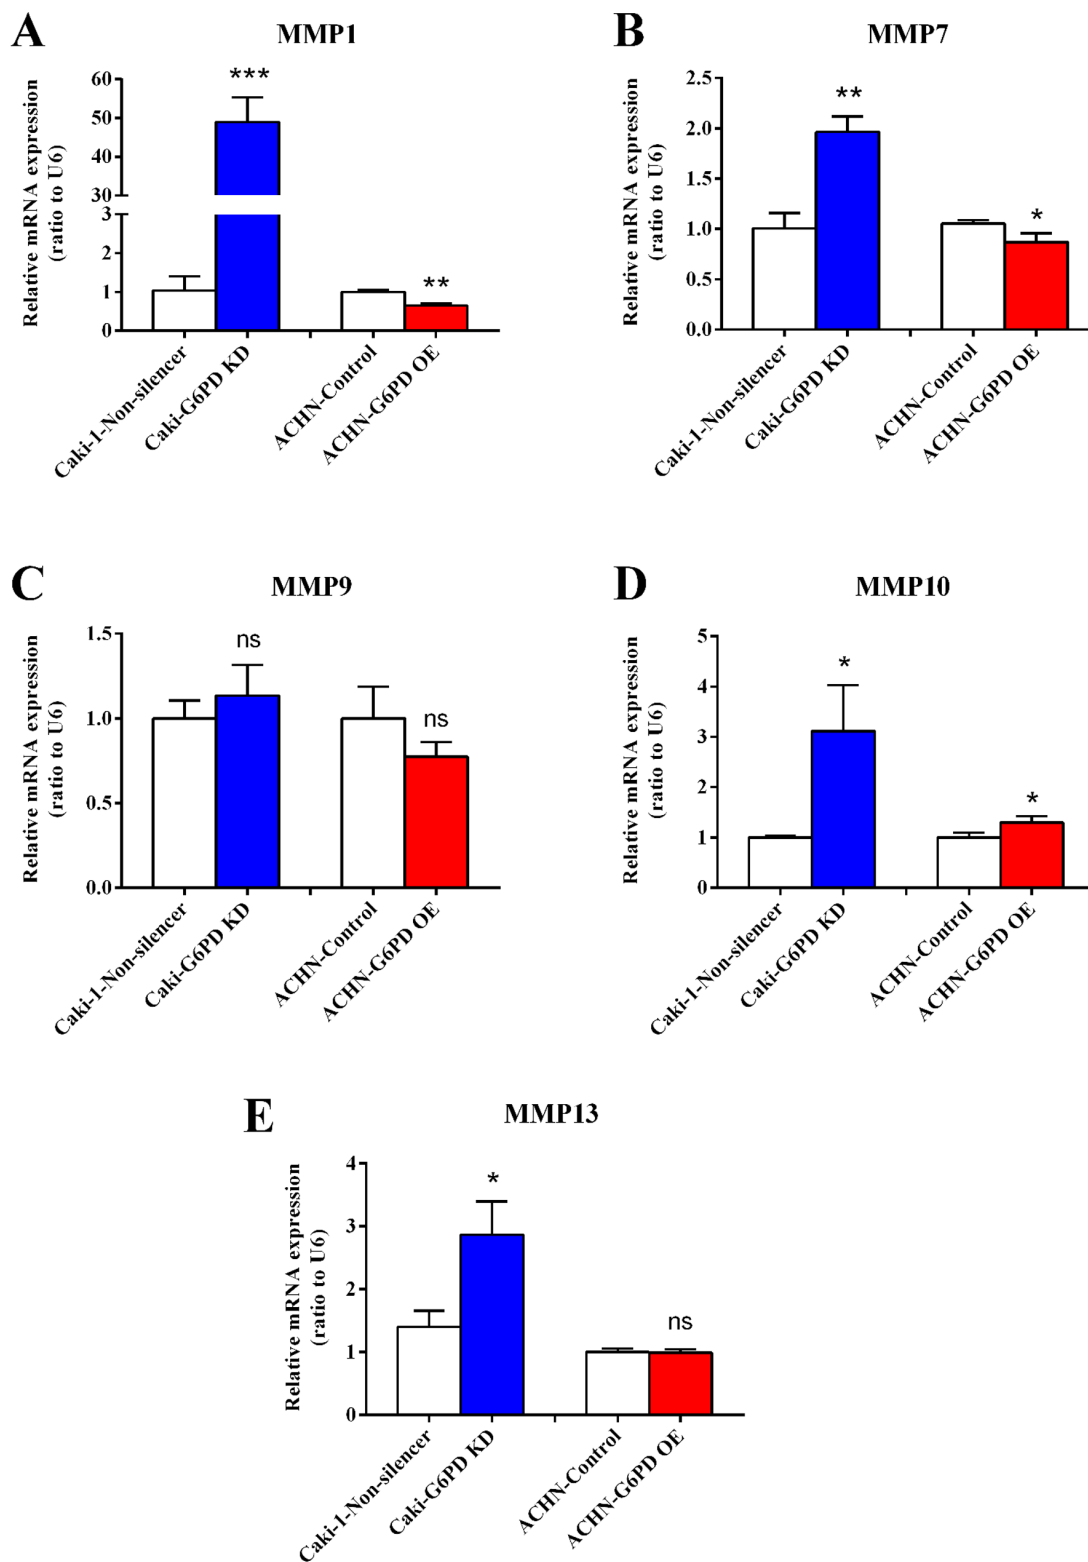

Figure S2. Quantitative analysis of (A) G6PD and (B) MMP2 protein expression in mice tumors following western blotting analysis (Fig. 7E). GAPDH served as a loading control. Data were expressed as the means  $\pm$  standard deviation. \*\*P<0.01 and \*\*\*P<0.001 vs. non-silencer or control. G6PD, glucose-6-phosphate dehydrogenase; KD, knockdown; MMP, matrix metalloproteinase; OE, overexpressing.

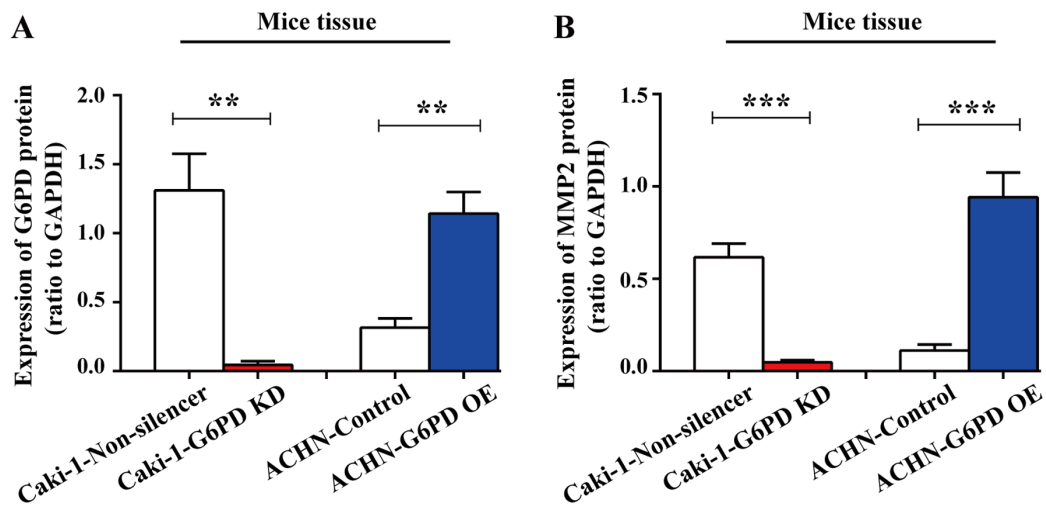

Supplement: Supplementary_Data.pdf [file Supplementary_Data.pdf]
